# Supplementary material
Source: bioRxiv or medRxiv preprint supplement (https://medrxiv.org/highwire/filestream/73338/field_highwire_adjunct_files/0/2020.03.07.20032516-1.pdf)
Supplement: Supplementary file [file 2020.03.07.20032516-1.pdf]

# Supplementary Material: Detecting heterogeneity using analysis and meta-analysis of differences in variance between two groups

Harriet L Mills<sup>a,b</sup>, Julian PT Higgins<sup>a,b</sup>, Richard W Morris<sup>b</sup>, David Kessler<sup>b</sup>, Jon Heron<sup>a,b</sup>, Nicola Wiles<sup>b</sup>, George Davey Smith<sup>a,b</sup>, Kate Tilling<sup>a,b</sup>

## Affiliations:

<sup>a</sup>Medical Research Council Integrative Epidemiology Unit, Bristol Medical School, University of Bristol, Bristol, UK

<sup>b</sup>Population Health Sciences, Bristol Medical School, University of Bristol, Bristol, UK

## Table of Contents

|                                                                                                          |    |
|----------------------------------------------------------------------------------------------------------|----|
| 1. Table of Studies.....                                                                                 | 2  |
| 2. Methods for examining difference in variance between trial arms – extension to main text methods..... | 5  |
| 2.1 Examining differences in variance between two arms using data from one trial....                     | 5  |
| 2.2 Examining the relationship between mean and variation across the two arms.....                       | 8  |
| 3. CoV Simulation Study.....                                                                             | 10 |
| 3.1 Methods .....                                                                                        | 10 |
| 2.2 Results .....                                                                                        | 10 |
| 4. Analysis of a single trial.....                                                                       | 13 |
| 4.1 Methods .....                                                                                        | 13 |
| 4.2 Results .....                                                                                        | 13 |
| 5. Meta-Analyses .....                                                                                   | 14 |
| 5.1 Results .....                                                                                        | 14 |
| 6. Power Simulation Study .....                                                                          | 19 |
| 6.1 Methods .....                                                                                        | 19 |
| 6.2 Results .....                                                                                        | 20 |
| References .....                                                                                         | 22 |

## 1. Table of Studies

Table A 1: Summary of the findings of studies using meta-analysis to examine variation between arms, as cited in the introduction of the main text.

| Trial           | Statistic       | Topic                                                           | Outcome measure                                                                   | Number of studies in meta-analysis           | Finding                                                                                                                                                                                                                     |
|-----------------|-----------------|-----------------------------------------------------------------|-----------------------------------------------------------------------------------|----------------------------------------------|-----------------------------------------------------------------------------------------------------------------------------------------------------------------------------------------------------------------------------|
| Cally (1)       | logCVR          | Sexual selection and population fitness                         | “fitness components measured in females under stressful conditions”               | 27                                           | <i>“under stressful conditions, sexual selection tends to reduce the phenotypic variance in fitness traits”</i><br>logCVR = -0.78 (95%CI -1.23, -0.34) for females; for mixed sex it is similar logCVR=-0.76 (-1.22, -0.31) |
| Chamberlain (2) | logSDR (=logVR) | Visuospatial ability in people with dyslexia                    | Performance in high-level visuospatial tasks                                      | 97 effect sizes                              | Dyslexia is associated with a greater variability in performance on visuospatial tasks<br>logSDR = 0.102 (SE=0.0366, p=0.0108)                                                                                              |
| Munkholm (3)    | logVR<br>logCVR | Individual response to antidepressants for depression in adults | Hamilton Depression Rating Scale or the Montgomery-Åsberg Depression Rating Scale | 345 comparisons from 222 RCTs                | No evidence for a larger variance in the antidepressant arm compared with placebo overall                                                                                                                                   |
| O'Dea (4)       | logCVR          | Gender differences in academic grades at school                 | Academic grades                                                                   | 346 effects sizes extracted from 227 studies | There is less variation in girls' grades in STEM subjects than boys', at school:<br>logCVR = -0.114 (-0.133, -0.095)                                                                                                        |

|                 |                  |                                                                                                                                      |                                                                                   |                                                                                                  |                                                                                                                                                                                |
|-----------------|------------------|--------------------------------------------------------------------------------------------------------------------------------------|-----------------------------------------------------------------------------------|--------------------------------------------------------------------------------------------------|--------------------------------------------------------------------------------------------------------------------------------------------------------------------------------|
| Pillinger (5)   | logVR,<br>logCVR | Immune parameters in psychosis                                                                                                       | Levels of peripheral immune parameters (eg. Level of blood cytokines)             | 35                                                                                               | For two immune parameters there is lower variance in control arm.<br>For one immune parameter there is lower variance in intervention arm.                                     |
| Plöderl (6)     | logVR<br>logCVR  | Personalised treatment with anti-depressants                                                                                         | Hamilton Depression Rating Scale or the Montgomery-Åsberg Depression Rating Scale | 163 randomised, placebo-controlled trials                                                        | No evidence for larger variance in the arms receiving antidepressants compared with the control arm, for any antidepressant.                                                   |
| Prendergast (7) | F-test           | Is there a difference in mean spinal bone mass density across genotype groups in pre-menopausal women (illustration of their method) | Mean spinal bone mass density                                                     | 13                                                                                               | MLE 1.36 (1.03)<br>REML 1.34 (1.00, 1.79)                                                                                                                                      |
| Senior (8)      | logVR,<br>logCVR | Dietary restriction and longevity                                                                                                    | Mean longevity                                                                    | “77 effect sizes of mean longevity from 21 studies across 14 species” from English and Uller (9) | positive, but not "statistically significant", increase in variance in the arm with dietary restrictions<br>logVR = 0.05 (95% CI -0.045, 0.154)<br>logCVR=0.09 (-0.021, 0.205) |

|                   |                                            |                                                                                        |                    |    |                                                                                                                                                                                                              |
|-------------------|--------------------------------------------|----------------------------------------------------------------------------------------|--------------------|----|--------------------------------------------------------------------------------------------------------------------------------------------------------------------------------------------------------------|
| Senior (10)       | logVR,<br>logCVR,<br>logSD                 | Effect of two dietary interventions on variability in weight (illustration of methods) | Body mass (kg)     | 16 | Not "statistically significant" - but low carbohydrate diets result in more variance in weight than calorie restricted diet:<br>logVR = -0.08 (-0.19, 0.02)<br>logCVR = -0.10 (-0.20, 0.9x10 <sup>-3</sup> ) |
| Williamson (11)   | <i>"true individual response variance"</i> | Weight change in response to an exercise intervention                                  | Weight change (kg) | 12 | There is greater variability in weight change in the exercise arm, but it is not "significant":<br>SD_IR = 0.8 (-0.9, 1.4) kg                                                                                |
| Winkelbeiner (12) | logVR                                      | RCTs of anti-psychotic drugs in patients with schizophrenia                            | Syndrome scale     | 52 | Lower variation in intervention arm<br>logVR = 0.97 (95%CI 0.95, 0.99)                                                                                                                                       |

## 2. Methods for examining difference in variance between trial arms – extension to main text methods

In the following two sections we describe in full the methods summarised in Table 1 of the main text.

Throughout the paper we use the following notation. We assume each RCT has two groups, referred to as control ( $i=0$ ) and intervention ( $i=1$ ). The groups are of size  $N_0$  and  $N_1$ , respectively, where  $N=N_0+N_1$  is the total sample size of the trial. The  $j^{\text{th}}$  individual in the trial has group allocation  $Z_j$  ( $=0$  or  $1$ ), and a response  $Y_j$ . Let  $\mu_i$  and  $\sigma_i^2$  be the underlying mean and variance of responses  $Y_j$  for individuals in group  $i$ , with sample estimates denoted by  $\hat{\mu}_i$  and  $\hat{\sigma}_i^2$ .

### 2.1 Examining differences in variance between two arms using data from one trial

**Glejser's test.** The test proposed by Glejser (13) takes the absolute value of the residuals ( $\epsilon_j$ ) from the standard linear model:

$$Y_j = \beta_0 + \beta_1 Z_j + \epsilon_j,$$

and regresses them on the explanatory variable (in this instance, the arm indicator  $Z_j$ ):

$$|\epsilon_j| = \gamma_0 + \gamma_1 Z_j + v_j$$

A one-sample t-test based on  $\hat{\gamma}_1$  of whether  $\gamma_1 = 0$  is used to test the null hypothesis that the variances in the two arms are the same. The linear model can include covariates, and thus examine whether known covariates explain the differences in variance.

**Levene's test.** Levene's test is suitable for non-normally distributed data (and may be less powerful than the alternatives for normally distributed data) and can be based on absolute deviations from the median, mean or trimmed mean (14). For the two trial arms, using the notation defined above, the test statistic is calculated as:

$$W = (N - 2) * \frac{\sum_{i=0}^1 N_i (X_i - X_{..})^2}{\sum_{i=0}^1 \sum_{j=1}^{N_i} (X_{ij} - X_i)^2}$$

where, within each arm ( $i = 0,1$ ), we define  $X_{ij} = |Y_j - m_i|$  (i.e. the absolute deviations where  $m_i$  is either the mean ( $\mu_i$ ), the median (resulting in the Brown-Forsythe test (15)) or the trimmed mean of responses in the  $i$ th arm),  $X_i = \frac{1}{N_i} \sum_{j=1}^{N_i} X_{ij}$  is the mean of the  $X_{ij}$  within arm  $i$  and  $X_{..} = \frac{1}{N} \sum_{i=0}^1 \sum_{j=1}^{N_i} X_{ij}$  is the mean of all  $X_{ij}$ .

The test statistic has an approximate F-distribution with 1 and  $N - 2$  degrees of freedom. It is noted that Levene's test can also be performed using a regression framework (as with Glejser's test, but using least absolute deviation regression (16)), in which case an estimate of the difference in variation can be obtained alongside a p-value. As with Glesjer's test, the initial least absolute deviation regression model can be extended to include other covariates.

**Bartlett's test.** The equality of variances between two arms can be tested using Bartlett's test (17). This involves a test statistic,  $T_B$ , calculated as:

$$T_B = \frac{(N-2) \ln(\hat{\sigma}_p^2) - ((N_0-1) \ln(\hat{\sigma}_0^2) + (N_1-1) \ln(\hat{\sigma}_1^2))}{1 + \frac{1}{3} \left( \left( \frac{1}{(N_0-1)} + \frac{1}{(N_1-1)} \right) - \frac{1}{N-2} \right)}$$

where  $\hat{\sigma}_p^2 = \frac{1}{N-2} \sum_{i=0}^1 (N_i-1) \hat{\sigma}_i^2$  (the weighted estimate for the variance).

The test statistic,  $T_B$ , has an approximate  $\chi_1^2$  distribution when the variances are equal. Bartlett's test assumes that the underlying distributions in each arm of the trial are Normal.

**Estimating parameters from a linear model with non-constant variance (LMNCV).** The standard linear model for a two-arm trial with a continuous outcome assumes that the variances are equal in the two arms, such that  $\sigma_0^2 = \sigma_1^2 = \sigma^2$ :

$$Y_j = \beta_0 + \beta_1 Z_j + \epsilon_j,$$

with

$$\epsilon_j \sim N(0, \sigma^2).$$

Here  $\beta_0 (= \mu_0)$  is the mean in the control arm and  $\beta_1$  is the difference in means between the arms ( $\mu_1 - \mu_0$ ). Omitting the intercept, we can write this using the notation above as

$$Y_j = \mu_0(1 - Z_j) + \mu_1 Z_j + \epsilon_j,$$

$$\epsilon_j \sim N(0, \sigma^2).$$

We can extend this formulation to allow the variances to differ between the two arms:

$$Y_j = \mu_0(1 - Z_j) + \mu_1 Z_j + \epsilon_{0j} Z_j(1 - Z_j) + \epsilon_{1j} Z_j,$$

with

$$\epsilon_{ij} \sim N(0, \sigma_i^2), \text{ for } i = 0, 1.$$

This model can be re-expressed in the form of a linear mixed model (LME) as follows, facilitating implementation in mixed modelling software:

$$Y_j = \beta_0 + \beta_1 Z_j + u_j Z_j + \epsilon_j,$$

with

$$\epsilon_j \sim N(0, \sigma_\epsilon^2) \text{ \& } u_j \sim N(0, \sigma_u^2).$$

Here,  $\sigma_\epsilon^2 (= \sigma_0^2)$  is the variance in the control arm and  $\sigma_u^2$  is the difference in variance between the arms ( $\sigma_1^2 - \sigma_0^2$ ). To estimate the parameters from this form of the model freely, software must allow variances to be negative. Since many software packages require all variances to be positive, the mixed model parameterisation would require that the model be specified with the arm with larger variance as arm 1. Whichever formulation of the model is used, post-estimation confidence intervals (or credible intervals if a Bayesian framework is

used) can be derived for either the difference or the ratio of the two variances. Both formulations also can include covariates and thus can be used to investigate the known factors that might explain the difference in variances.

**Estimating the magnitude of difference (VD).** The magnitude of the difference between the two variances can be estimated by taking the difference of the sample variances. The difference of variances (DoV) is obtained by simple subtraction:

$$\text{DoV} = \sigma_1^2 - \sigma_0^2$$

The approximate standard error (SE) of each estimated variance,  $\hat{\sigma}_i^2$ , is

$$\text{SE}_{\sigma_i^2} = \hat{\sigma}_i^2 \sqrt{\frac{2}{N_i - 1}}$$

Since in a two-arm trial the two arms are independent, the SE of the DoV is given by

$$\text{SE}_{\text{DoV}} = \sqrt{\text{SE}_{\sigma_0^2}^2 + \text{SE}_{\sigma_1^2}^2} = \sqrt{2 \left( \frac{\hat{\sigma}_0^4}{N_0 - 1} + \frac{\hat{\sigma}_1^4}{N_1 - 1} \right)}.$$

The variability of the two arms is compared by a t-test, with test statistic  $\text{DoV}/\text{SE}_{\text{DoV}}$ .

**The ratio of variances method (F-test, RoV).** A simple F statistic formed by the ratio of sample variances between the two arms,

$$F = \frac{\hat{\sigma}_0^2}{\hat{\sigma}_1^2}$$

follows the F-distribution with  $N_0 - 1$  and  $N_1 - 1$  degrees of freedom if the true variances of two normally distributed variables are equal, so can be used to test for equality of the two variances (assuming that the outcome is Normally distributed in both groups). The F-distribution can be used to derive a confidence interval for the RoV.

**Log of the ratio of standard deviations (logSDR).** The log of the ratio of standard deviations can be used to compare variance between two arms (12, 18); logSDR is calculated as the log of the ratio of standard deviations:

$$\log\text{SDR} = \log\left(\frac{\sigma_1}{\sigma_0}\right) + \frac{1}{2(N_1 - 1)} - \frac{1}{2(N_0 - 1)}$$

with sampling variance

$$\sigma_{\log\text{SDR}}^2 = \frac{1}{2(N_1 - 1)} + \frac{1}{2(N_0 - 1)}$$

(Note that this is called the log of the variability ratio, and referred to as logVR in (12, 18) but to avoid notation confusion we have used SDR to reflect that it is the ratio of standard deviations.)

The variability of the two arms is compared by a t-test on logSDR (i.e., the test statistic is  $\log\text{SDR}/\sigma_{\log\text{SDR}}$ ).

## 2.2 Examining the relationship between mean and variation across the two arms

**Difference in coefficient of variation (CVD).** For arm  $i$  with mean  $\mu_i$  and SD  $\sigma_i$  the CoV is estimated as:

$$\text{CoV}_i = \frac{\hat{\sigma}_i}{\hat{\mu}_i}$$

We use the method described by Feltz and Miller (19) to compare the CoV of two arms. A pooled CoV across the arms is

$$\text{CoV}_p = \frac{(N_0 - 1)\hat{\sigma}_0^2 + (N_1 - 1)\hat{\sigma}_1^2}{N_0 + N_1 - 2},$$

and the test statistic is

$$Z = \frac{\text{CoV}_0 - \text{CoV}_1}{\sqrt{\left(\frac{\text{CoV}_p^2}{N_0 - 1} + \frac{\text{CoV}_p^2}{N_1 - 1}\right)(0.5 + \text{CoV}_p^2)}}$$

$Z^2$  approximates the chi-square distribution with one degree of freedom. This method performs best if each  $N_i > 10$  and each  $\text{CoV}_i > 0.33$  (19).

**Log of the coefficient of variation ratio (logCVR).** Using the CoV as calculated above, the log of the ratio of coefficient of variations can be calculated and used to compare differences in variability between the two arms (18):

$$\log\text{CVR} = \log\left(\frac{\text{CoV}_1}{\text{CoV}_0}\right) + \frac{1}{2(N_1 - 1)} - \frac{1}{2(N_0 - 1)}$$

where  $\text{CoV}_i = \sigma_i/\mu_i$ . As logCVR uses the CoV, it should only be used when data satisfies the same criteria as for using CoV (data on a ratio scale, with a meaningful zero).

The sampling variance is defined

$$\begin{aligned} \sigma_{\log\text{CVR}}^2 &= \frac{\sigma_0}{N_0\mu_0^2} + \frac{1}{2(N_0 - 1)} - 2\rho_{\log\mu_0, \log\sigma_0} \sqrt{\frac{\sigma_0^2}{N_0\mu_0^2} \frac{1}{2(N_0 - 1)}} \\ &+ \frac{\sigma_1}{N_1\mu_1^2} + \frac{1}{2(N_1 - 1)} - 2\rho_{\log\mu_1, \log\sigma_1} \sqrt{\frac{\sigma_1^2}{N_1\mu_1^2} \frac{1}{2(N_1 - 1)}} \end{aligned}$$



where  $\rho_{\log\mu_i, \log\sigma_i}$  are the correlations between the means and standard deviations (on log scales) across studies, for the control ( $i = 0$ ) and intervention ( $i = 1$ ) arms.

These rho terms can be removed if we make the assumption that the data are normally distributed (as in the R package that implements these equations for meta-analysis, *metafor*). In this work, we assume normality and therefore remove the rho terms.

The variances of the two arms are compared by a t-test on logCVR (i.e., the test statistic is  $\log\text{CVR}/\sigma_{\log\text{CVR}}$ ).

### 3. CoV Simulation Study

#### 3.1 Methods

Data are simulated for 20 trials with 100 observations in each, as follows:

**Scenario 1 (same CoV in each arm),** for each trial:

1. Randomly assign observations to treatment, T=0 or T=1, with probability 0.5
2. Generate baseline values as  $\alpha_0 = \mu_0 + 10$  where  $\mu_0$  is drawn from a normal distribution  $N(0,1)$  (i.e  $\alpha_0 \sim N(10,1)$  )
3. Calculate outcomes so that the CoV is 0.5 in each arm:

$$\text{if } T = 0: \text{Outcome} = \alpha_0 + \alpha_0 \times 0.5 \times \beta_1$$

$$\text{if } T = 1: \text{Outcome} = (\alpha_0 + 10) + (\alpha_0 + 10) \times 0.5 \times \beta_1$$

4. Record the N in each arm and calculate the mean and SD of each arm.

**Scenario 2 (different CoV in each arm),** for each trial:

1. Randomly assign observations to treatment, T=0 or T=1, with probability 0.5
2. Generate baseline values as  $\alpha_0 = \mu_0 + 10$  where  $\mu_0$  is drawn from a normal distribution  $N(0,1)$  (i.e  $\alpha_0 \sim N(10,1)$  )
3. Calculate outcomes so that the CoV is 0.5 in arm 0 and 1.0 in arm 1:

$$\text{if } T = 0: \text{Outcome} = \alpha_0 + \alpha_0 \times 0.5 \times \beta_1$$

$$\text{if } T = 1: \text{Outcome} = (\alpha_0 + 10) + (\alpha_0 + 10) \times 1 \times \beta_1$$

5. Record the N in each arm and calculate the mean and SD of each arm.

Each scenario was then analysed as follows:

Across the 20 trials, (1) correlations between mean and SD of each arm were calculated; (2) mean and SD for each arm were plotted against one another; (3) coefficient of variation was calculated for both arms of each trial; (4) these CoVs were meta-analysed, as described in the main paper.

Code (in R) is included with this paper for these simulations.

#### 2.2 Results

The seed is fixed at the start of these scenarios, because of this, the scenarios have the same correlation between mean and SD in the control arms (T=0), Table A 2.

*Table A 2: Correlation between mean and SD and mean CoV for the simulated trials in each scenario.*

|                                 | Scenario 1 |      | Scenario 2 |      |
|---------------------------------|------------|------|------------|------|
|                                 | T=0        | T=1  | T=0        | T=1  |
| Correlation between mean and SD | 0.53       | 0.38 | 0.53       | 0.27 |
| Mean CoV                        | 0.48       | 0.48 | 0.48       | 0.95 |

Figure A1 and Figure A2 plot the mean against the SD from the two arms, for each scenario, and include unadjusted regression lines (with intercept and forced through the origin). The unadjusted regression line is not helpful for interpreting the coefficient of variation. For example, it may seem that the mean and SD are not related when in fact they are, because of regression dilution bias. This could be mitigated by using the regression line forced through the origin (shown in orange below).

Figure A 1: Plot of mean outcome vs SD for scenario 1. The correlation coefficient is given as  $r$ , in the bottom right of each plot. Blue solid line: the unadjusted regression line and 95% confidence intervals. Orange dashed line: the unadjusted regression line, forced through the origin, with 95% confidence intervals.

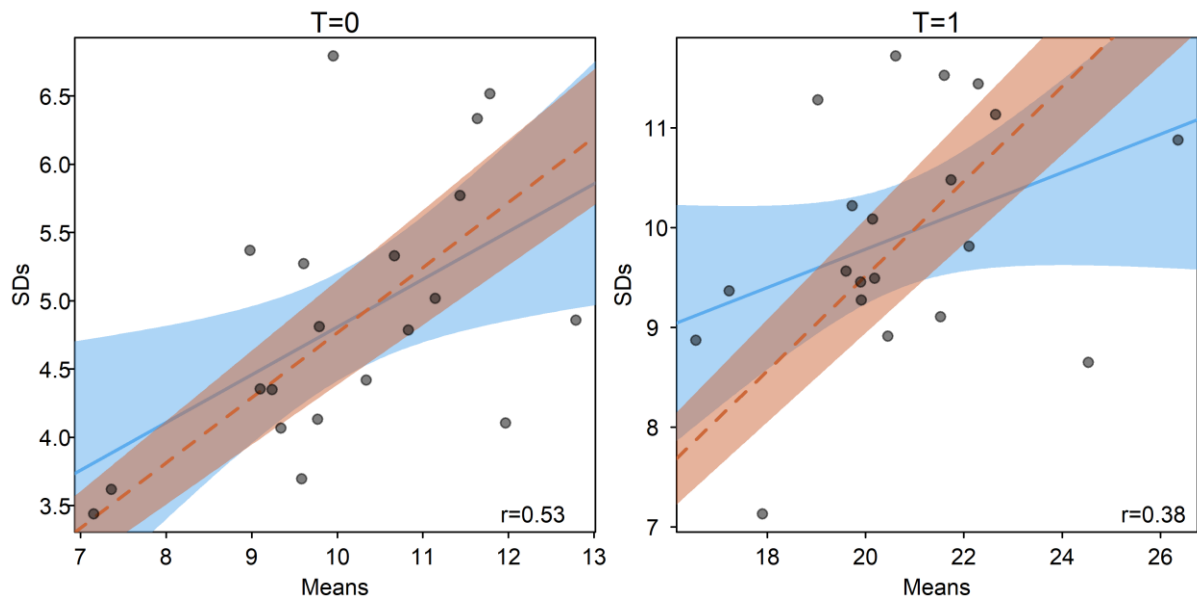

Figure A 2: Plot of mean outcome vs SD for scenario 2. The correlation coefficient is given as  $r$ , in the bottom right of each plot. Blue solid line: the unadjusted regression line and 95% confidence intervals. Orange dashed line: the unadjusted regression line, forced through the origin, with 95% confidence intervals.

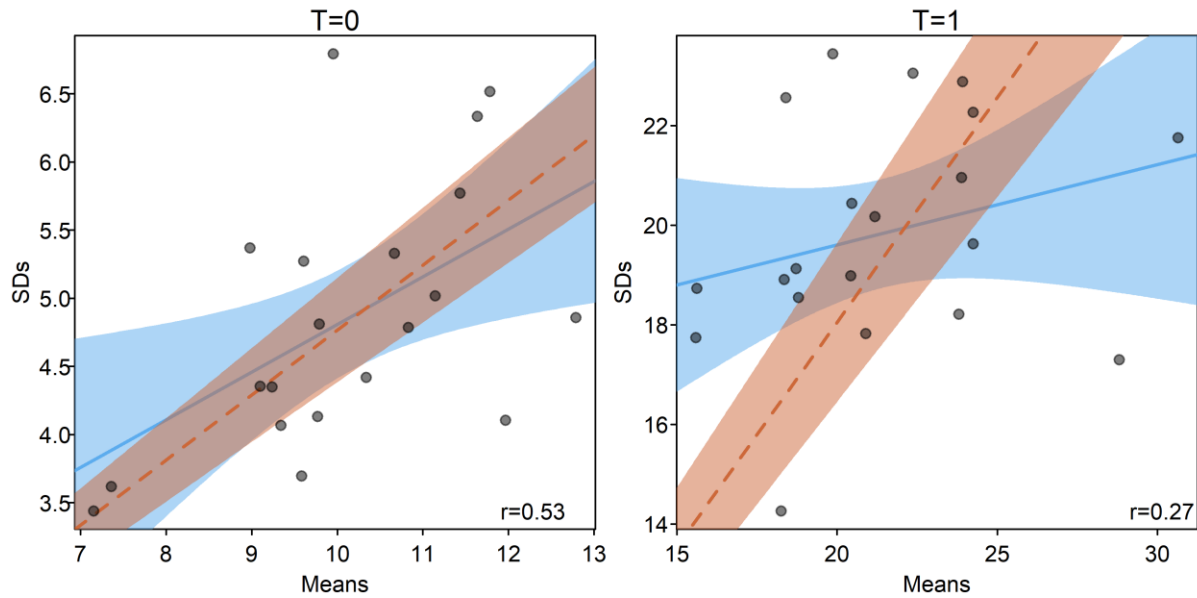

The meta-analysis shows that the coefficient of variation behaves quite differently in the two scenarios. In scenario 1, the CoVs are around 0.5 in both arms, and the meta-analysis estimates imply that differences in variation between arms across the trials may be due to differences in the means. In scenario 2, the CoV are different between the arms and the meta-analysis estimates imply that differences in variation between arms were not just due to differences in the means, Table A 3.

Table A 3: Meta-analysis of the CoV for the simulated trials from each scenario.

| Meta analysis |                    | Estimate | Standard Error | Lower   | Upper   | Pvalue |
|---------------|--------------------|----------|----------------|---------|---------|--------|
| Scenario 1    | <b>Fixed</b>       | -0.0063  | 0.0182         | -0.0421 | 0.0294  | 0.7285 |
|               | <b>Rando<br/>m</b> | -0.0052  | 0.0216         | -0.0474 | 0.0371  | 0.8100 |
| Scenario 2    | <b>Fixed</b>       | -0.4246  | 0.0309         | -0.4853 | -0.3640 | 0.0000 |
|               | <b>Rando<br/>m</b> | -0.4462  | 0.0428         | -0.5300 | -0.3624 | 0.0000 |

These scenarios demonstrate how the correlation plots tell us nothing about the CoV across the meta-analysis.

## 4. Analysis of a single trial

### 4.1 Methods

Figure A 3: Beck Depression Inventory (BDI) score at baseline (A) and at 4-month follow-up (B) in Kessler et al (20). The 4-month BDI scores are not normally distributed. Colours indicate the different arms (darker red where they overlap).

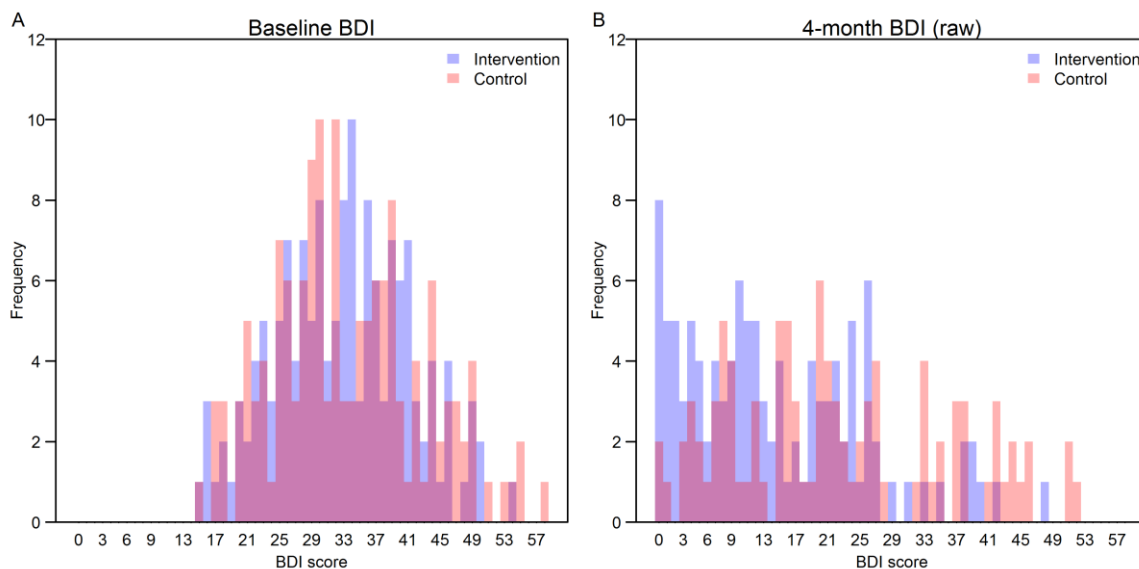

### 4.2 Results

#### Sensitivity Analysis

Table A 4 shows the results of all tests on the IPD at baseline. The results for all tests are similar, with no evidence for any difference in variance between the intervention and control arm, even when testing only the subset remaining after excluding those lost to attrition at 4 month follow up. The intervention arm had 24% attrition at 4 months, compared to 34% in the control arm.

Table A 4: Tests for difference in variance in BDI score at baseline, between the intervention and control arms from the Kessler 2009 paper exploring the effect of a CBT intervention on depression. The test statistics are the Bartlett's  $k$ -squared for Bartlett's test, the ratio of variances for the F-test and the Levene test-statistic for Levene's test.

| Test                                                           | Test Statistic | p-value | Estimate | SE    |
|----------------------------------------------------------------|----------------|---------|----------|-------|
| <i>Baseline</i>                                                |                |         |          |       |
| Levene test (median)                                           | 1.468          | 0.23    | 0.735    | 0.607 |
| Levene test (mean)                                             | 1.904          | 0.17    | 0.808    | 0.585 |
| Levene test (trimmed mean)                                     | 1.659          | 0.20    | 0.762    | 0.592 |
| Bartlett's test                                                | 1.655          | 0.20    | NA       | NA    |
| F-test                                                         | 0.809          | 0.20    | NA       | NA    |
| <i>Baseline, excluding those lost to attrition by 4 months</i> |                |         |          |       |
| Levene test (median)                                           | 2.453          | 0.12    | 1.083    | 0.691 |
| Levene test (mean)                                             | 2.618          | 0.11    | 1.111    | 0.686 |
| Levene test (trimmed mean)                                     | 2.515          | 0.11    | 1.092    | 0.688 |
| Bartlett's test                                                | 1.637          | 0.20    | NA       | NA    |
| F-test                                                         | 0.777          | 0.20    | NA       | NA    |

## 5. Meta-Analyses

### 5.1 Results

Table A 5: Results for the Richards et al (21) meta-analyses (self-reported depression measures\*). Yellow shading in each row indicates the arm with the higher SD. Orange shading indicates which trials had evidence for unequal variances between intervention and control arms using the Difference in Variances or Ratio of Variance tests. Estimates are also plotted in Figure 1. The final rows show the results of the pooled RoV test, and the meta-analysis of the Differences in Variance tests.

| Study                    | Measure used | Intervention arm |       |    | Control arm |       |    | Difference in Variances test [95% CI] | Ratio of Variances [95% CI] | Log of variability ratio [95% CI] |
|--------------------------|--------------|------------------|-------|----|-------------|-------|----|---------------------------------------|-----------------------------|-----------------------------------|
|                          |              | Mean             | SD    | N  | Mean        | SD    | N  |                                       |                             |                                   |
| Andersson et al 2005     | BDI          | 12.2             | 6.8   | 36 | 19.5        | 8.1   | 49 | -19.37 [-53.40, 14.66]                | 0.70 [0.38, 1.34]           | -0.17 [-0.48, 0.14]               |
| De Graaf et al 2009&2011 | BDI          | 20.6             | 10.4  | 97 | 22.1        | 10.2  | 97 | 4.12 [-38.34, 46.58]                  | 1.04 [0.70, 1.55]           | 0.02 [-0.18, 0.22]                |
| Hollandare et al 2011    | BDI          | 9.3              | 12    | 38 | 13.4        | 11.9  | 39 | 2.39 [-89.04, 93.82]                  | 1.02 [0.53, 1.95]           | 0.01 [-0.31, 0.33]                |
| Kessler et al 2009       | BDI          | 14.5             | 11.2  | 11 | 22          | 13.5  | 97 | -56.81 [-117.95, 4.33]                | 0.69 [0.47, 1.01]           | -0.19 [-0.38, 0.01]               |
| Meyer et al 2009         | BDI          | 19.87            | 11.85 | 15 | 27.15       | 10.01 | 57 | 40.22 [-8.11, 88.56]                  | 1.40 [0.89, 2.12]           | 0.16 [-0.05, 0.38]                |
| Perini et al 2009        | BDI          | 17.3             | 9.86  | 9  | 23.33       | 9.29  | 17 | 10.92 [-68.89, 90.72]                 | 1.13 [0.43, 2.66]           | 0.05 [-0.39, 0.49]                |
| Proudfoot 2003&2004      | BDI          | 12.1             | 9.3   | 27 | 18.4        | 10.9  | 10 | -32.32 [-73.63, 8.99]                 | 0.73 [0.49, 1.09]           | -0.16 [-0.36, 0.04]               |
| Ruwaard et al 2009       | BDI-IA       | 9.8              | 6.5   | 95 | 15.6        | 7.6   | 18 | -15.51 [-59.09, 28.07]                | 0.73 [0.30, 1.60]           | -0.17 [-0.58, 0.24]               |
| Spek et al 2007&2008     | BDI          | 11.97            | 8.05  | 10 | 14.46       | 10.42 | 10 | -43.77 [-78.91, -8.64]                | 0.60 [0.40, 0.88]           | -0.26 [-0.45, -0.06]              |
| Titov et al 2010         | BDI-II       | 15.29            | 9.81  | 2  | 26.15       | 10.14 | 40 | -6.58 [-68.72, 55.56]                 | 0.94 [0.50, 1.76]           | -0.03 [-0.35, 0.28]               |
| Vernmark et al 2010      | BDI          | 10.3             | 5.2   | 41 | 16.6        | 7.9   | 29 | -35.37 [-71.00, 0.26]                 | 0.43 [0.20, 0.92]           | -0.42 [-0.79, -0.05]              |
| <b>All trials</b>        |              |                  |       |    |             |       |    |                                       |                             |                                   |
|                          |              |                  |       |    |             |       |    | -19.13 [-32.79, -5.48]                |                             |                                   |
| <b>Fixed</b>             |              |                  |       |    |             |       |    |                                       |                             |                                   |
| <b>Random</b>            |              |                  |       |    |             |       |    | -18.19 [-33.80, -2.58]                | 0.82 [0.67, 1.00]           | -0.10 [-0.20, -0.00]              |

Table A 6: Results for the Palmer et al (22) meta-analyses, measuring the impact of statins on LDL cholesterol (reported in mg/dL). Yellow shading in each row indicates the arm with the higher SD. Orange shading indicates which trials had evidence for unequal variances between intervention and control arms using Differences in Variances test or the Ratio of Variance tests, and in which trials a difference in variance may be driven by the mean using the coefficient of variation test. Estimates are also plotted in Figure 2. The final rows show the results of the pooled RoV test, and the meta-analysis of the Differences in Variances and CoV tests.

| Study           | Intervention arm |    |    |      | Control arm  |    |    |      | Difference in Variances test [95% CI] | Ratio of Variances [95% CI] | Coefficient of Variation test [95% CI] |
|-----------------|------------------|----|----|------|--------------|----|----|------|---------------------------------------|-----------------------------|----------------------------------------|
|                 | Mean (mg/dL)     | SD | N  | CoV  | Mean (mg/dL) | SD | N  | CoV  |                                       |                             |                                        |
| Tonolo 1997     | 127              | 35 | 10 | 0.28 | 189          | 37 | 9  | 0.20 | -144.00 [-1899.25, 1611.25]           | 0.89 [0.21, 3.67]           | 0.08 [-0.09, 0.25]                     |
| Hommel 1992     | 100              | 19 | 12 | 0.19 | 182          | 39 | 9  | 0.21 | -1160.00 [-2680.78, 360.78]           | 0.24 [0.06, 0.87]           | -0.02 [-0.16, 0.11]                    |
| Nielsen 1993    | 116              | 22 | 8  | 0.19 | 166          | 37 | 10 | 0.22 | -885.00 [-2247.72, 477.72]            | 0.35 [0.08, 1.71]           | -0.03 [-0.18, 0.12]                    |
| Aranda 1994     | 166              | 37 | 8  | 0.22 | 208          | 12 | 8  | 0.06 | 1225.00 [-217.14, 2667.14]            | 9.51 [1.90, 47.49]          | 0.17 [0.06, 0.27]                      |
| LORD Study 2006 | 95               | 35 | 16 | 0.37 | 160          | 45 | 18 | 0.28 | -800.00 [-2419.21, 819.21]            | 0.60 [0.22, 1.70]           | 0.09 [-0.09, 0.26]                     |
| Fried 2001      | 97               | 27 | 6  | 0.28 | 124          | 23 | 11 | 0.19 | 200.00 [-815.68, 1215.68]             | 1.38 [0.33, 9.12]           | 0.09 [-0.08, 0.26]                     |
| Zhang 1995      | 100              | 24 | 10 | 0.24 | 127          | 29 | 10 | 0.23 | -265.00 [-1206.81, 676.81]            | 0.68 [0.17, 2.76]           | 0.01 [-0.15, 0.17]                     |
| Imai 1999       | 128              | 23 | 15 | 0.18 | 155          | 44 | 19 | 0.28 | -1407.00 [-2731.15, -82.85]           | 0.27 [0.10, 0.79]           | -0.10 [-0.23, 0.02]                    |
| Lam 1995        | 116              | 31 | 16 | 0.27 | 146          | 33 | 18 | 0.23 | -128.00 [-1132.48, 876.48]            | 0.88 [0.32, 2.48]           | 0.04 [-0.09, 0.17]                     |
| Mori 1992       | 93               | 22 | 18 | 0.24 | 126          | 33 | 15 | 0.26 | -605.00 [-1474.87, 264.87]            | 0.44 [0.15, 1.22]           | -0.03 [-0.16, 0.11]                    |
| Makamura 2002   | 130              | 24 | 20 | 0.18 | 216          | 36 | 20 | 0.17 | -720.00 [-1621.85, 181.85]            | 0.44 [0.18, 1.12]           | 0.02 [-0.06, 0.10]                     |
| Verma 2005      | 80               | 32 | 44 | 0.40 | 133          | 44 | 39 | 0.33 | -912.00 [-1884.19, 60.19]             | 0.53 [0.28, 0.98]           | 0.07 [-0.06, 0.20]                     |
| Yasuda 2004     | 127              | 37 | 39 | 0.29 | 168          | 36 | 41 | 0.21 | 73.00 [-764.57, 910.57]               | 1.06 [0.56, 2.00]           | 0.08 [-0.01, 0.16]                     |

|                                 |     |    |         |      |     |    |         |      |                            |                   |                      |
|---------------------------------|-----|----|---------|------|-----|----|---------|------|----------------------------|-------------------|----------------------|
| Goicoechea 2006                 | 101 | 25 | 44      | 0.25 | 126 | 29 | 19      | 0.23 | -216.00 [-825.66, 393.66]  | 0.74 [0.31, 1.55] | 0.02 [-0.08, 0.12]   |
| Panichi 2005                    | 104 | 29 | 28      | 0.28 | 131 | 21 | 27      | 0.16 | 400.00 [-108.65, 908.65]   | 1.91 [0.87, 4.14] | 0.12 [0.03, 0.21]    |
| Bianchi 2003                    | 121 | 21 | 28      | 0.17 | 206 | 21 | 28      | 0.10 | 0.00 [-332.69, 332.69]     | 1.00 [0.46, 2.16] | 0.07 [0.02, 0.12]    |
| Lee 2002                        | 102 | 18 | 42      | 0.18 | 116 | 28 | 40      | 0.24 | -460.00 [-835.18, -84.82]  | 0.41 [0.22, 0.77] | -0.06 [-0.13, 0.00]  |
| ESPLANADE Study 2010            | 96  | 33 | 92      | 0.34 | 132 | 38 | 94      | 0.29 | -355.00 [-876.90, 166.90]  | 0.75 [0.50, 1.14] | 0.06 [-0.01, 0.13]   |
| Sawara 2006                     | 99  | 13 | 22      | 0.13 | 125 | 17 | 16      | 0.14 | -120.00 [-350.71, 110.71]  | 0.58 [0.21, 1.48] | -0.00 [-0.07, 0.06]  |
| UK-HARP-I 2005                  | 85  | 29 | 12<br>1 | 0.34 | 114 | 33 | 12<br>0 | 0.29 | -248.00 [-597.07, 101.07]  | 0.77 [0.54, 1.11] | 0.05 [-0.01, 0.11]   |
| Di Lullo 2005                   | 87  | 8  | 80      | 0.09 | 161 | 23 | 50      | 0.14 | -465.00 [-675.42, -254.58] | 0.12 [0.07, 0.20] | -0.05 [-0.08, -0.02] |
| PREVEND IT 2000                 | 120 | 35 | 37<br>5 | 0.29 | 151 | 35 | 37<br>9 | 0.23 | 0.00 [-247.64, 247.64]     | 1.00 [0.82, 1.22] | 0.06 [0.03, 0.09]    |
| <b>All trials</b>               |     |    |         |      |     |    |         |      |                            |                   |                      |
| <b>Fixed</b>                    |     |    |         |      |     |    |         |      | -220.36 [-318.84, -121.87] | -                 | 0.02 [0.01, 0.03]    |
| <b>Random</b>                   |     |    |         |      |     |    |         |      | -226.33 [-376.77, -75.90]  | 0.66 [0.48, 0.91] | 0.03 [-0.00, 0.06]   |
| <b>Removing trials N&lt;=10</b> |     |    |         |      |     |    |         |      |                            |                   |                      |
| <b>Fixed</b>                    |     |    |         |      |     |    |         |      | -223.51 [-323.90, -123.12] | -                 | 0.02 [0.00, 0.03]    |
| <b>Random</b>                   |     |    |         |      |     |    |         |      | -233.17 [-388.82, -77.53]  | 0.62 [0.44, 0.87] | 0.03 [-0.01, 0.06]   |



Table A6, continued.

| <b>Study</b>         | <b>Log of variability ratio [95% CI]</b> | <b>Log of coefficient of variation ratio [95% CI]</b> |
|----------------------|------------------------------------------|-------------------------------------------------------|
| Tonolo 1997          | -0.06 [-0.74, 0.61]                      | 0.34 [-0.37, 1.04]                                    |
| Hommel 1992          | -0.74 [-1.38, -0.09]                     | -0.14 [-0.81, 0.53]                                   |
| Nielsen 1993         | -0.50 [-1.20, 0.19]                      | -0.15 [-0.87, 0.58]                                   |
| Aranda 1994          | 1.13 [0.39, 1.87]                        | 1.35 [0.59, 2.11]                                     |
| LORD Study 2006      | -0.25 [-0.74, 0.24]                      | 0.27 [-0.27, 0.81]                                    |
| Fried 2001           | 0.21 [-0.55, 0.97]                       | 0.46 [-0.34, 1.25]                                    |
| Zhang 1995           | -0.19 [-0.84, 0.46]                      | 0.05 [-0.64, 0.73]                                    |
| Imai 1999            | -0.64 [-1.13, -0.15]                     | -0.45 [-0.97, 0.07]                                   |
| Lam 1995             | -0.06 [-0.55, 0.43]                      | 0.17 [-0.35, 0.69]                                    |
| Mori 1992            | -0.41 [-0.91, 0.09]                      | -0.11 [-0.64, 0.42]                                   |
| Makamura 2002        | -0.41 [-0.86, 0.04]                      | 0.10 [-0.36, 0.56]                                    |
| Verma 2005           | -0.32 [-0.63, -0.01]                     | 0.19 [-0.16, 0.53]                                    |
| Yasuda 2004          | 0.03 [-0.29, 0.34]                       | 0.31 [-0.03, 0.64]                                    |
| Goicoechea 2006      | -0.16 [-0.55, 0.22]                      | 0.06 [-0.35, 0.47]                                    |
| Panichi 2005         | 0.32 [-0.06, 0.70]                       | 0.55 [0.15, 0.95]                                     |
| Bianchi 2003         | 0.00 [-0.38, 0.38]                       | 0.53 [0.15, 0.92]                                     |
| Lee 2002             | -0.44 [-0.75, -0.13]                     | -0.31 [-0.64, 0.01]                                   |
| ESPLANADE Study 2010 | -0.14 [-0.35, 0.06]                      | 0.18 [-0.05, 0.40]                                    |
| Sawara 2006          | -0.28 [-0.75, 0.19]                      | -0.04 [-0.52, 0.43]                                   |
| UK-HARP-I 2005       | -0.13 [-0.31, 0.05]                      | 0.16 [-0.03, 0.36]                                    |
| Di Lullo 2005        | -1.06 [-1.31, -0.81]                     | -0.44 [-0.70, -0.19]                                  |
| PREVEND IT 2000      | 0.00 [-0.10, 0.10]                       | 0.23 [0.12, 0.34]                                     |
| <b>All trials</b>    |                                          |                                                       |
| <b>Fixed</b>         |                                          |                                                       |
| <b>Random</b>        | -0.21 [-0.37, -0.05]                     | 0.12 [-0.02, 0.26]                                    |

**Fixed**

**Random**

-0.24 [-0.41, -0.08]

0.09 [-0.05, 0.24]

## 6. Power Simulation Study

### 6.1 Methods

To explore the power of the methods for detecting a difference in variance, under different scenarios, a simulation study was used.

#### Simulating data

A response  $Y = Y_0 + Z * Y_1$  was simulated for two arms  $Z \in (0,1)$  of size  $N_0$  and  $N_1$ , where  $Y_0$  was the response in the control arm and  $Y_1$  was the treatment effect. Then for  $N = N_0 + N_1$  individuals:

$$Y_0 \sim N(\mu_0, \sigma_0)$$
$$Y_1 \sim N(\mu_1, \sigma_1)$$

Without loss of generality, the variables were standardised to the standard deviation in the baseline arm (arm 0,  $\sigma_0 = 1$ ) with means  $\mu_0 = 0$  and  $\mu_1 = 1$  and with the standard deviation for  $Y_1$  allowed to vary such that  $\sigma_1 \in (0.2, 0.3, \dots, 1.0)$ . The number of individuals in each arm was fixed as  $N_0 = N_1 = N/2$ .

A single simulated dataset consisted of ID (1 to N), the response  $Y$  and an arm indicator  $Z$ . Two example simulated datasets for  $N = 10,000$  are shown in Figure A 4.

Figure A 4: Two simulated datasets of 10,000 responses (5000 in each arm,  $Z=0$  and  $Z=1$ ). Simulated with  $m_0 = 0$ ,  $m_1 = 1$ ,  $\sigma_0 = 1$  and (A)  $\sigma_1 = 0.1$  and (B)  $\sigma_1 = 1.0$ . Red shows  $Z = 0$  and blue shows  $Z = 1$  (where they overlap is the purple/red).

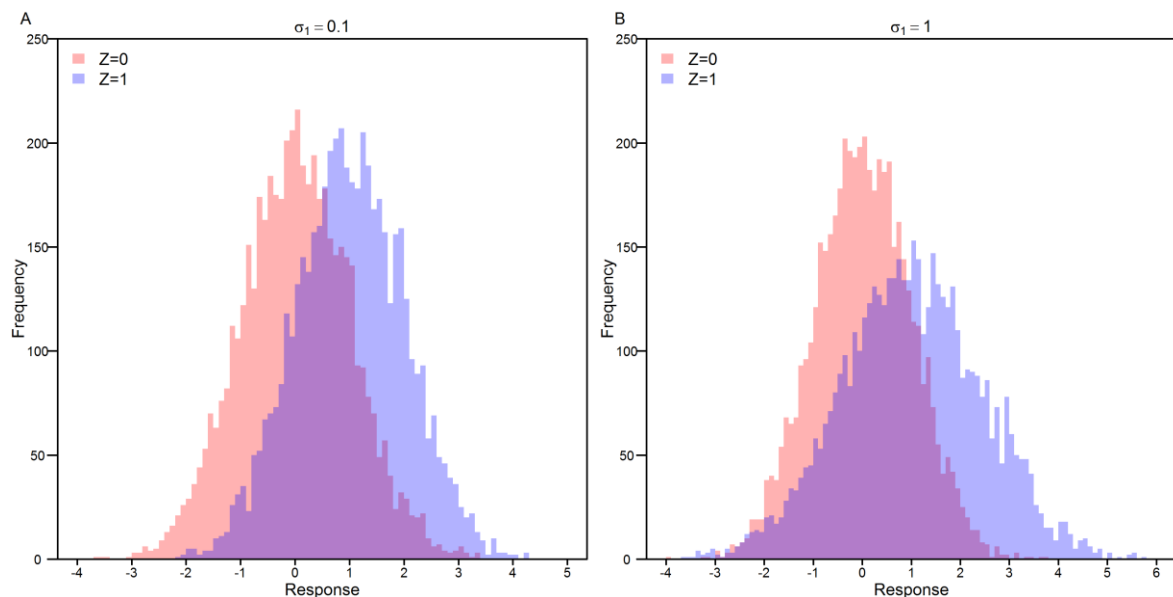

#### Simulation and analysis process

The aim was to determine what minimum sample size  $N$  allowed the difference in variance to be detected with 95% power, for different  $\sigma_1$  (standard deviation of the treatment effect).  $\sigma_1$  was varied between 0.2 and 1 (note that this meant the standard deviation of arm  $Z=1$  changed, as it is equal to the square root of the sum of the two standard deviations squared, i.e.  $\sqrt{\sigma_0^2 + \sigma_1^2}$ ). For each  $\sigma_1$ , a binary search algorithm was used first to find what value of  $N$  (the total sample size) obtained an approximately 50% power (for efficiency, this uses only 100 simulated datasets). Then, starting at this  $N$ ,  $N$  was increased up to 500,000 (with increasing step sizes) simulating 10,000 datasets for each  $N$ . In each of the 10,000 simulated datasets the difference in variance between the two arms was tested using: (1) an LME model; (2) Glejser's test; (3) Levene's test (using deviation from the mean); (4) Bartlett's test; (5) Ratio of Variances (F-test) method. For each  $N$  the power was defined as

the percentage of simulations for which the p-value for the test of the null hypothesis (that the difference in variance is zero) was  $<0.05$ .  $N$  was increased until the power to detect the difference in variance had reached a threshold of 95% for the last three  $N$ .

## 6.2 Results

Power to detect a difference in variance (using an LME model, Glejser's test, Levene's test, Bartlett's test and the Ratio of Variances method) increased with sample size  $N$  for all  $\sigma_1$  scenarios, though much larger sample sizes were required to obtain adequate power when the difference in variance between the arms was low (Figure A 5 & Figure A 6). Results were very similar for all methods, with the Bartlett's test, RoV method and the LMER model requiring very slightly lower sample size for the same power compared to Levene's and Glejser's tests.

Figure A 5: Plot of sample size ( $N$ ) vs the power to detect difference in variances between the two arms for scenarios with different standard deviations in the two arms (varying  $\sigma_1$ : see methods). The numbers on the lines indicate the value of  $\sigma_1$ . Grey dashed horizontal lines indicate power = 0.8, 0.9, 0.95 and 1.0. 10,000 simulations were performed for each  $N$ . (Figure A 6 shows individual panels for each  $\sigma_1$ , without a logged x-axis.)

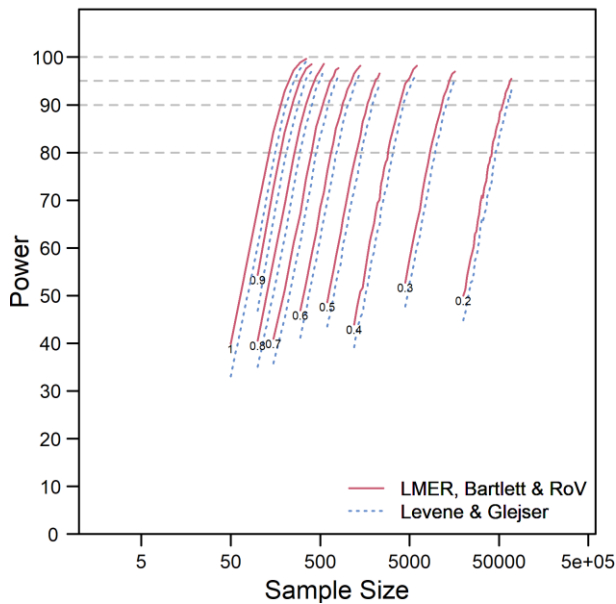

Figure A 6: Plots of  $N$  (sample size) vs the power to detect difference in variances between the two arms for scenarios with different standard deviations in the two arms (with fixed  $\sigma_0 \equiv 1$  varying  $\sigma_1$ : see methods). Grey dashed horizontal lines indicate power = 0.8, 0.9, 0.95 and 1.0. 10,000 simulations were performed for each  $N$ . This is an alternative version of Figure A 5. All methods are plotted, but the results are the same for (1) LMER, Bartlett's test and RoV (the purple/red, top line) and (2) Levene and Glejser tests (the blue, bottom line).

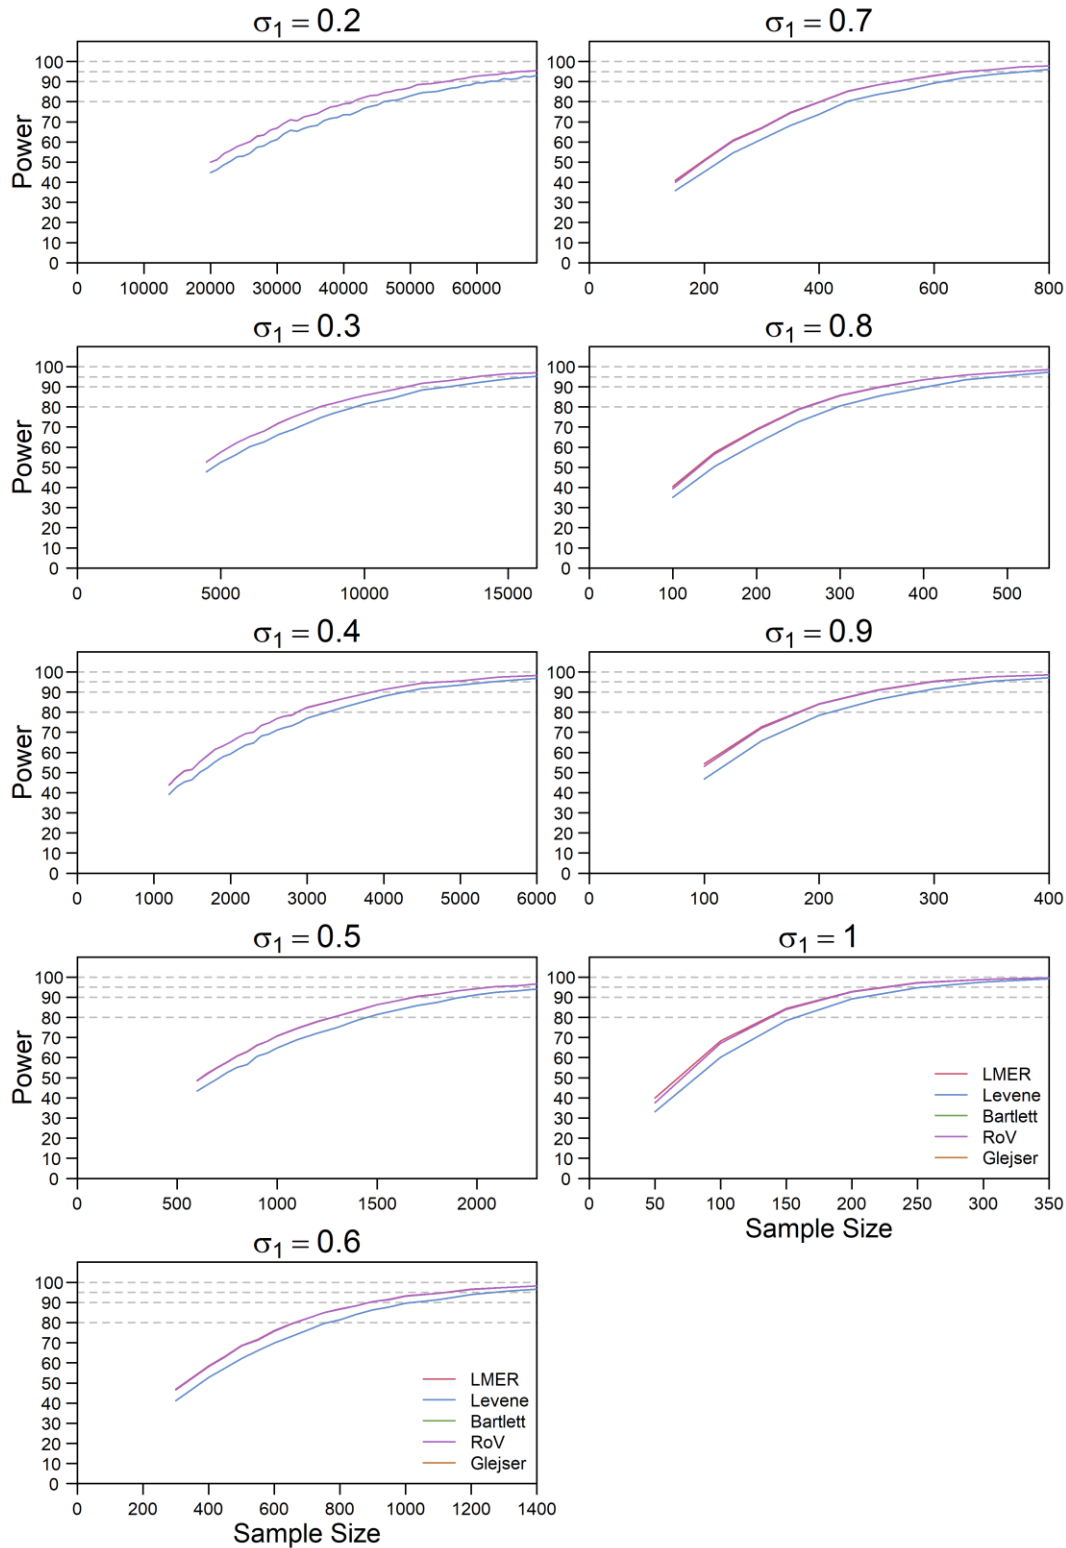

## References

1. Cally JG, Stuart-Fox D, Holman L. Meta-analytic evidence that sexual selection improves population fitness. *Nature Communications*. 2019;10(1):2017.
2. Chamberlain R, Brunswick N, Siev J, McManus IC. Meta-analytic findings reveal lower means but higher variances in visuospatial ability in dyslexia. *British Journal of Psychology*. 2018;109(4):897-916.
3. Munkholm K, Winkelbeiner S, Homan P. Individual response to antidepressants for depression in adults – a simulation study and meta-analysis. *Psyarxiv*. 2019.
4. O'Dea RE, Lagisz M, Jennions MD, Nakagawa S. Gender differences in individual variation in academic grades fail to fit expected patterns for STEM. *Nature Communications*. 2018;9(1):3777.
5. Pillinger T, Osimo E, Brugger S, Mondelli V, McCutcheon R, Howes O. A Meta-analysis of Immune Parameters, Variability, and Assessment of Modal Distribution in Psychosis and Test of the Immune Subgroup Hypothesis. *Schizophrenia Bulletin*. 2018;45(5):1120-33.
6. Plöderl M, Hengartner MP. What are the chances for personalised treatment with antidepressants? Detection of patient-by-treatment interaction with a variance ratio meta-analysis. *BMJ Open*. 2019;9(12).
7. Prendergast LA, Staudte RG. Meta-analysis of ratios of sample variances. *Statistics in Medicine*. 2016;35(11):1780-99.
8. Senior A, Nakagawa S, Raubenheimer D, Simpson S, Noble D. Dietary restriction increases variability in longevity. *Biology Letters*. 2017;13(3).
9. English S, Uller T, JBI. Does early-life diet affect longevity? A meta-analysis across experimental studies. 2016;12(9):20160291.
10. Senior AM, Gosby AK, Lu J, Simpson SJ, Raubenheimer D. Meta-analysis of variance: an illustration comparing the effects of two dietary interventions on variability in weight. *Evolution, Medicine, and Public Health*. 2016;2016(1):244-55.
11. Williamson PJ, Atkinson G, Batterham AM. Inter-individual differences in weight change following exercise interventions: a systematic review and meta-analysis of randomized controlled trials. *Obesity Reviews*. 2018;19(7):960-75.
12. Winkelbeiner S, Leucht S, Kane JM, Homan P. Evaluation of Differences in Individual Treatment Response in Schizophrenia Spectrum Disorders: A Meta-analysis. *JAMA Psychiatry*. 2019.
13. Glejser H. A New Test for Heteroskedasticity. *Journal of the American Statistical Association*. 1969;64(325):316-23.
14. Levene H. Robust Tests for Equality of Variances. In: Olkin I, editor. *Contributions to Probability and Statistics*. Palo Alto: Stanford Univ. Press; 1960.
15. Brown MB, Forsythe AB. Robust tests for the equality of variances. *Journal of the American Statistical Association*. 1974;69(346):364-7.
16. Soave D, Sun LJB. A generalized Levene's scale test for variance heterogeneity in the presence of sample correlation and group uncertainty. 2017;73(3):960-71.
17. Bartlett MS. Properties of Sufficiency and Statistical Tests. *Proceedings of the Royal Society of London Series A, Mathematical and Physical Sciences*. 1937;160(901):268-82.
18. Nakagawa S, Poulin R, Mengersen K, Reinhold K, Engqvist L, Lagisz M, et al. Meta-analysis of variation: ecological and evolutionary applications and beyond. *Methods in Ecology and Evolution*. 2015;6(2):143-52.
19. Feltz CJ, Miller GE. An asymptotic test for the equality of coefficients of variation from k populations. *Statistics in Medicine*. 1996;15(6):647-58.
20. Kessler D, Lewis G, Kaur S, Wiles N, King M, Weich S, et al. Therapist-delivered Internet psychotherapy for depression in primary care: a randomised controlled trial. *The Lancet*. 2009;374(9690):628-34.
21. Richards D, Richardson T. Computer-based psychological treatments for depression: a systematic review and meta-analysis. *Clinical Psychology Review*. 2012;32(4):329-42.

22. Palmer SC, Navaneethan SD, Craig JC, Johnson DW, Perkovic V, Hegbrant J, et al. HMG CoA reductase inhibitors (statins) for people with chronic kidney disease not requiring dialysis. *Cochrane Database of Systematic Reviews*. 2014(5).
